# Supplementary material
Source: MDPI journal article supplement (https://www.mdpi.com/2673-7078/1/1/3)

Supplementary Material to:
Simulating Metaphyseal Fracture Healing in the Distal Radius

Lucas Engelhardt, Frank Niemeyer, Patrik Christen, Ralph Müller, Kerstin Stock, Michael Blauth, Karsten Urban, Anita Ignatius, Ulrich Simon

Patient A:
female, 51 years, fracture type: A2.1, Radius: T-score: -1.00 Z-Score: -0.30, BMD: 0.52


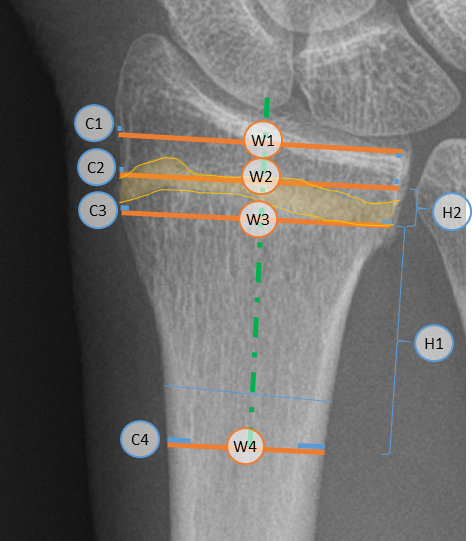
C1: 0.61,

C2: 1.14,

C3: 0.78,

C4: 2.67,

H1: 2.89,

H2: 23.09,

W1: 14.95,

W2: 10.50,

W3: 13.28,


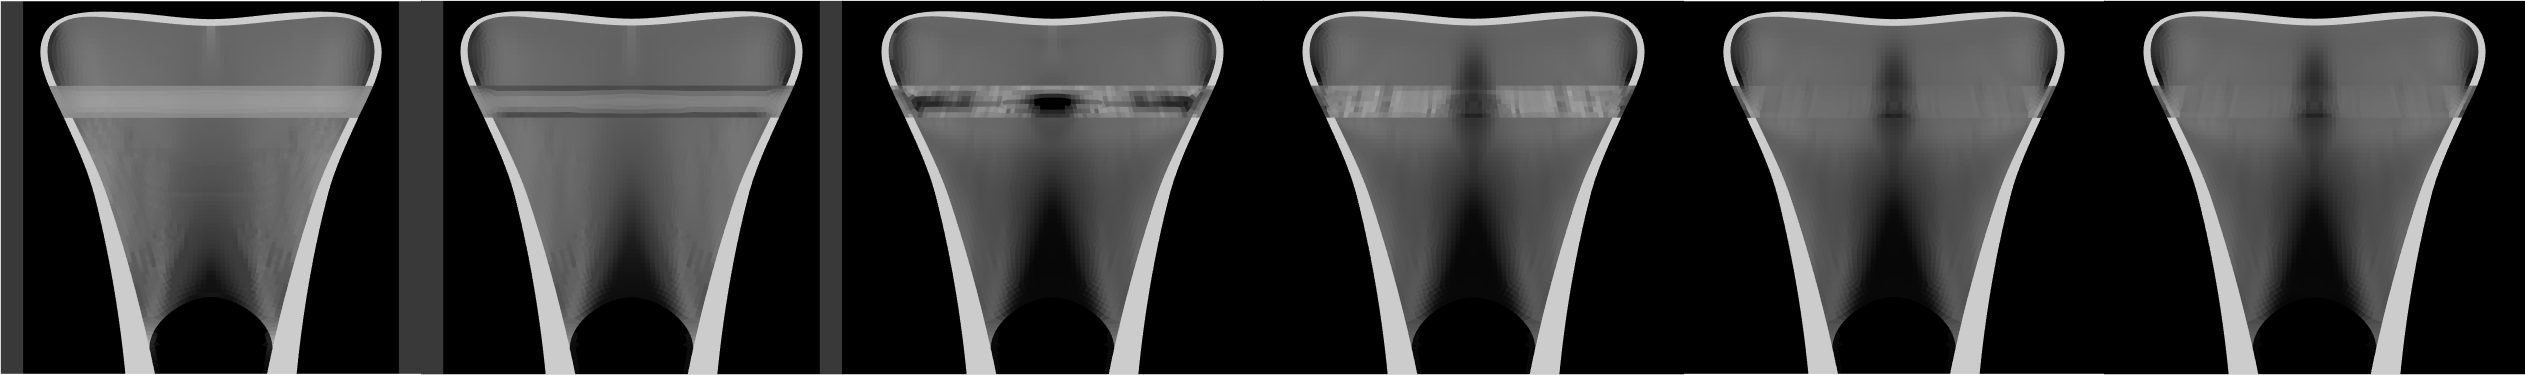
W4: 7.73


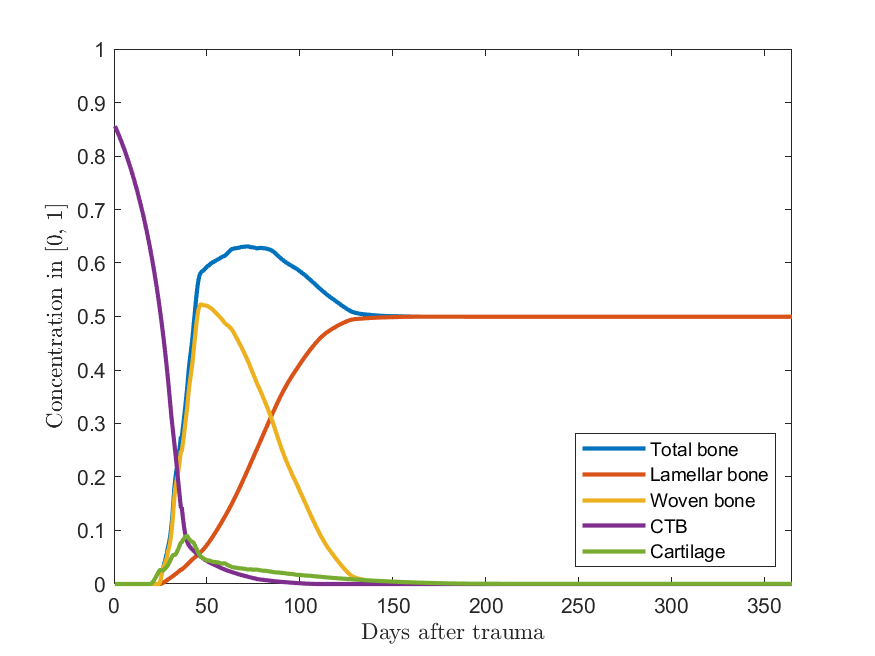


Patient B:
female, 86 years, fracture type: C1.1, Radius: T-Score: -1.90, Z-Score: -0.30, BMD: 0.48

C1: 0.7,


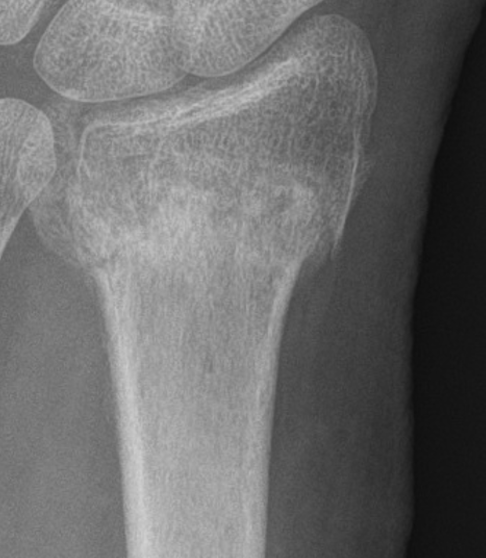


C2: 1.25,

C3: 1.1,

C4: 1.7,

H1: 1.63,

H2: 21.8,

W1: 13.45,

W2: 9.25,

W3: 12,

W4: 7.1


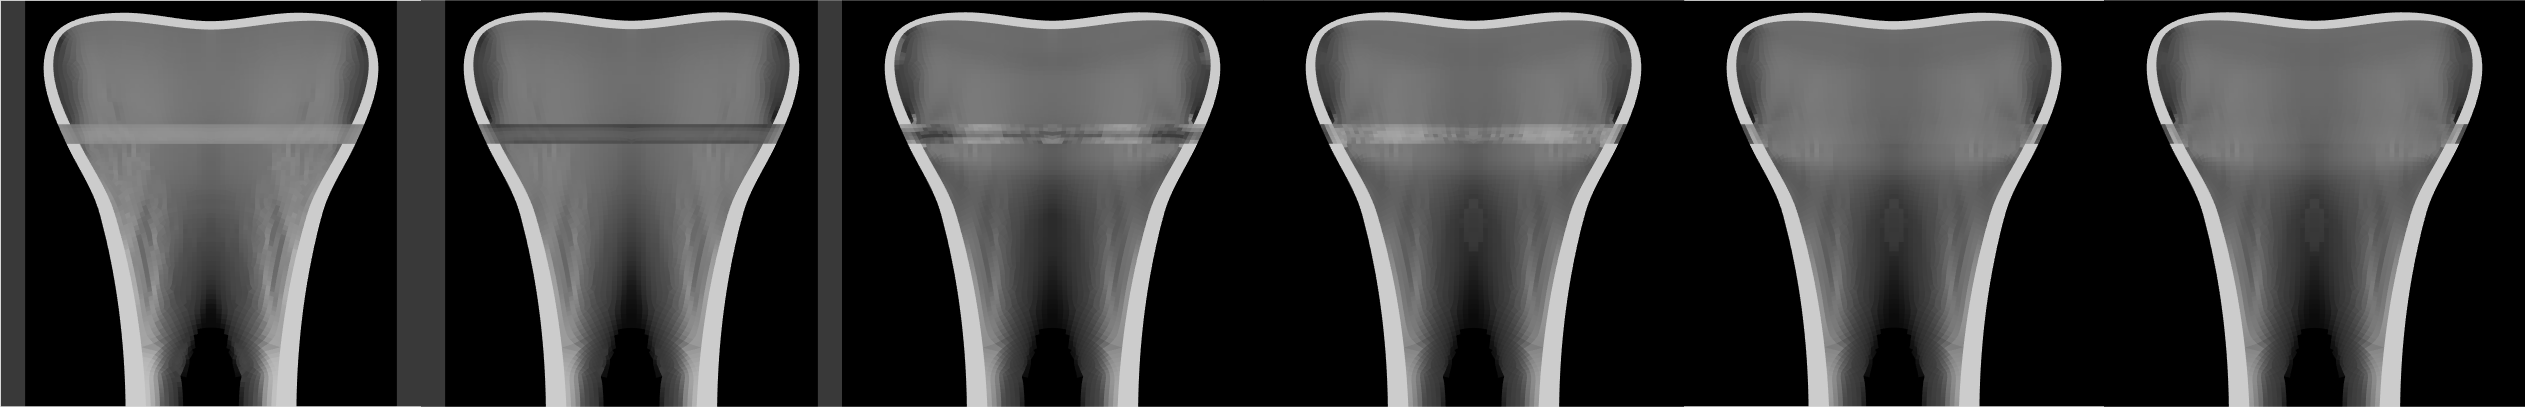


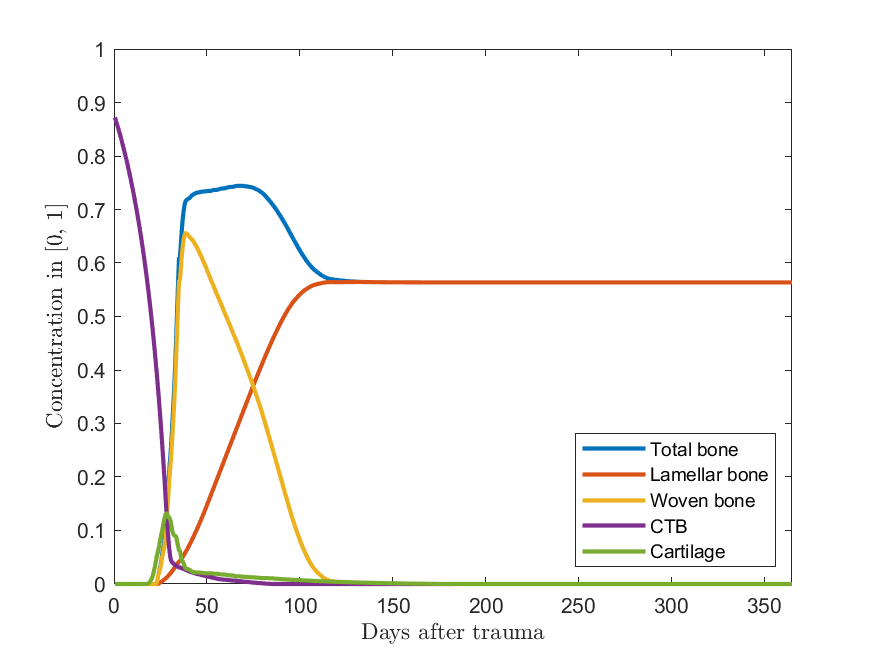


Patient C:
male, 33 years, fracture type: A2.1, Radius: T-Score: -0.90, Z-Score: -0.70, BMD: 0.53


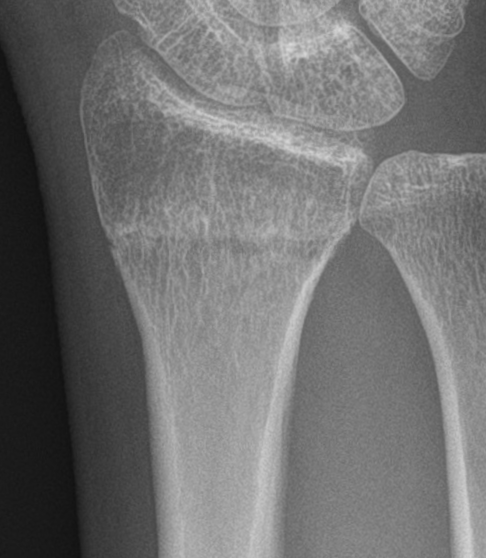


C1: 0.40,

C2: 0.84,

C3: 0.76,

C4: 2.16,

H1: 1.62,

H2: 21.14,

W1: 15.03,

W2: 9.51,

W3: 11.65,

W4: 5.95


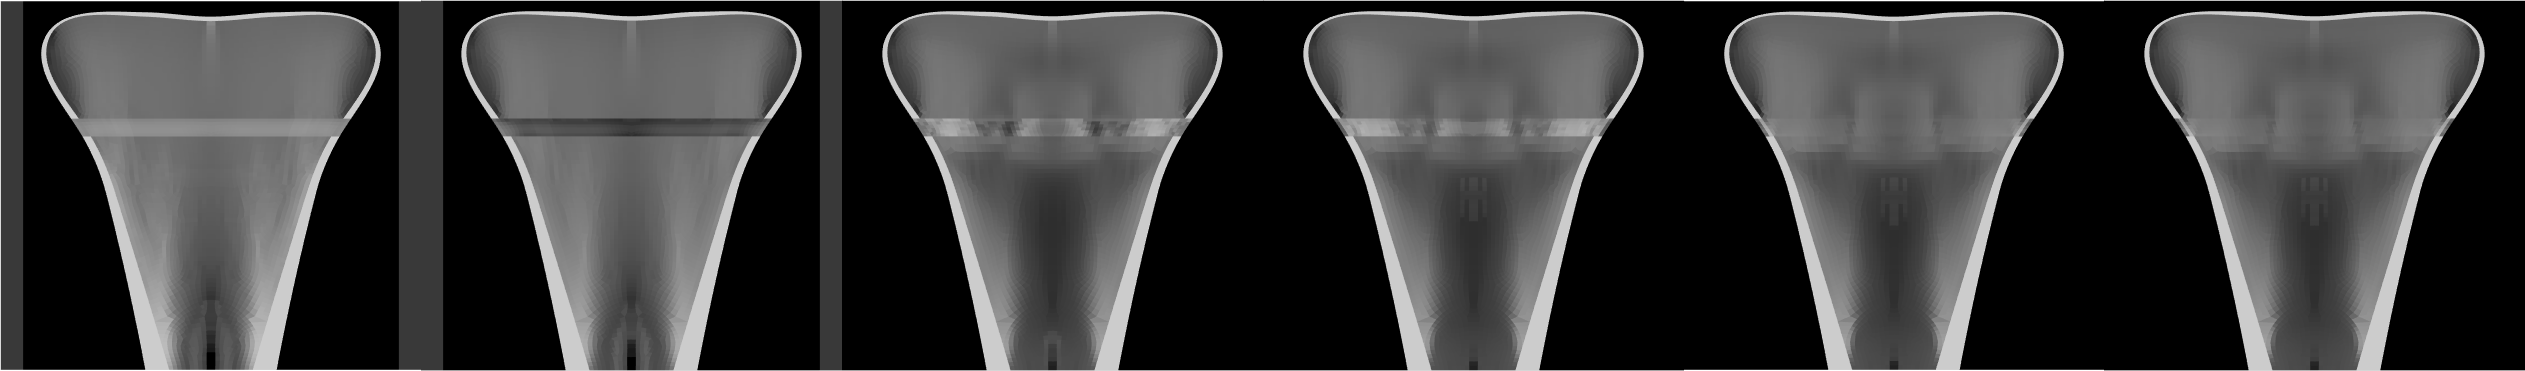


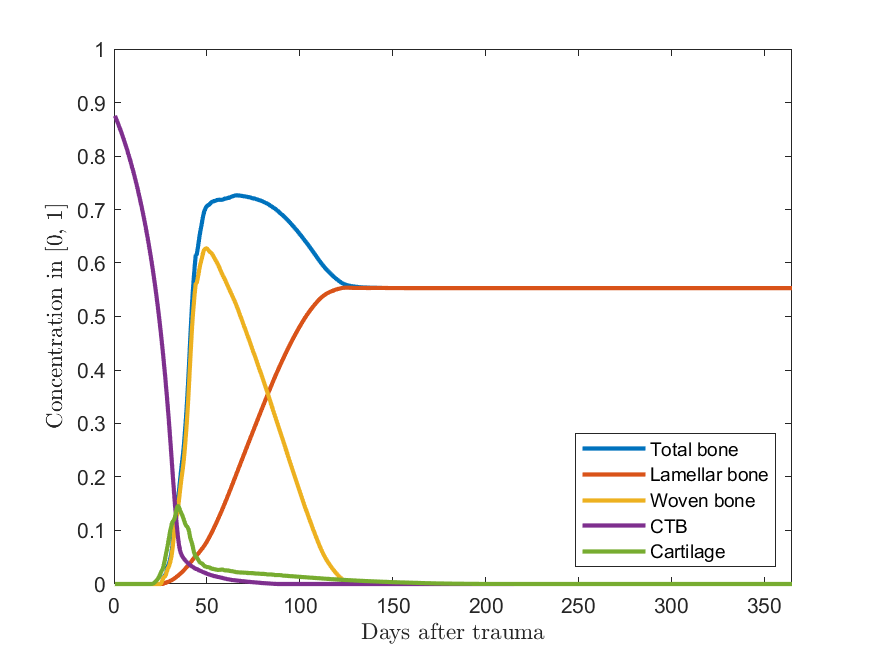


Patient D:
male, 45 years, fracture type: A2.1, Radius: T-Score: -1.90, Z-Score: -1.60, BMD: 0.59

C1: 0.5,


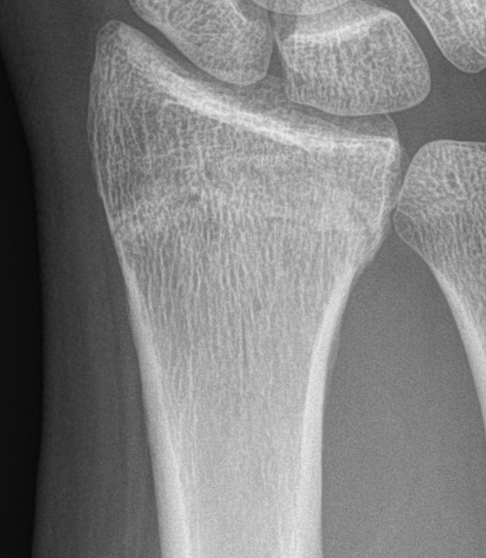


C2: 1.1,

C3: 0.64,

C4: 2.5,

H1: 4.4,

H2: 23.3,

W1: 14.15,

W2: 11.35,

W3: 13.8,


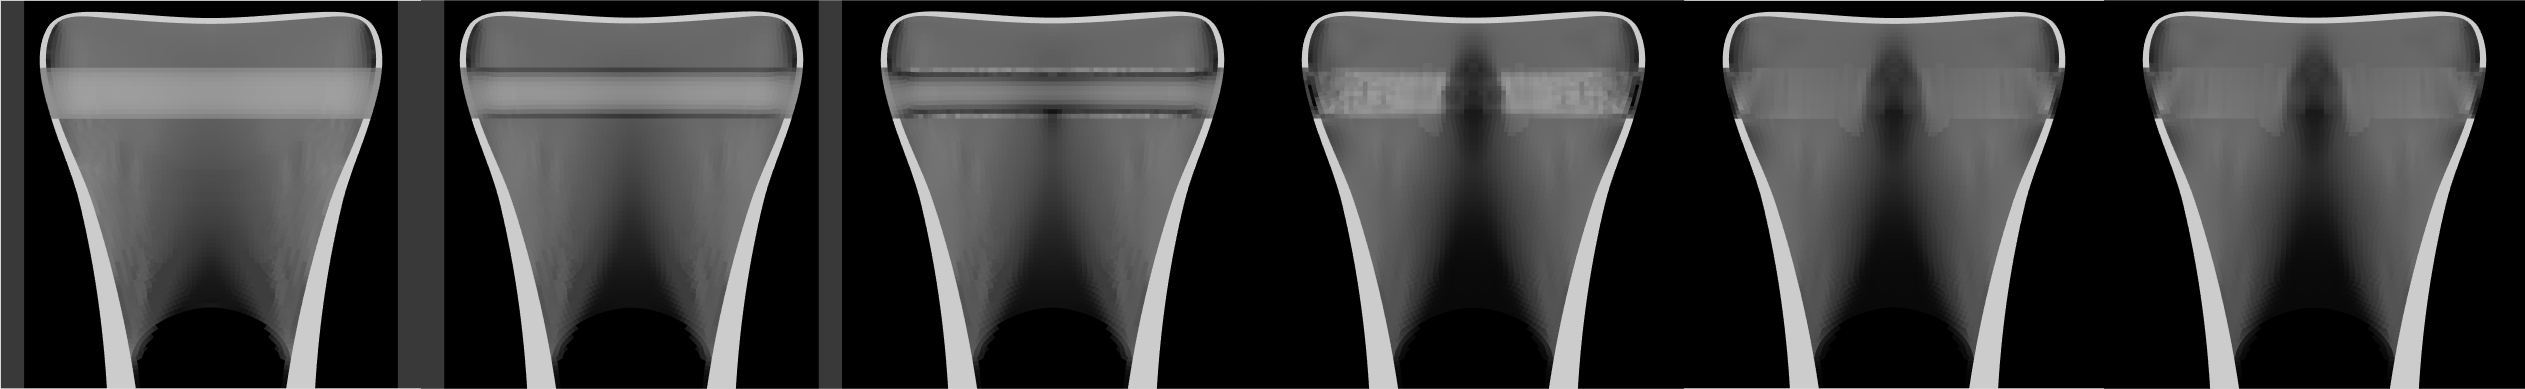
W4: 9


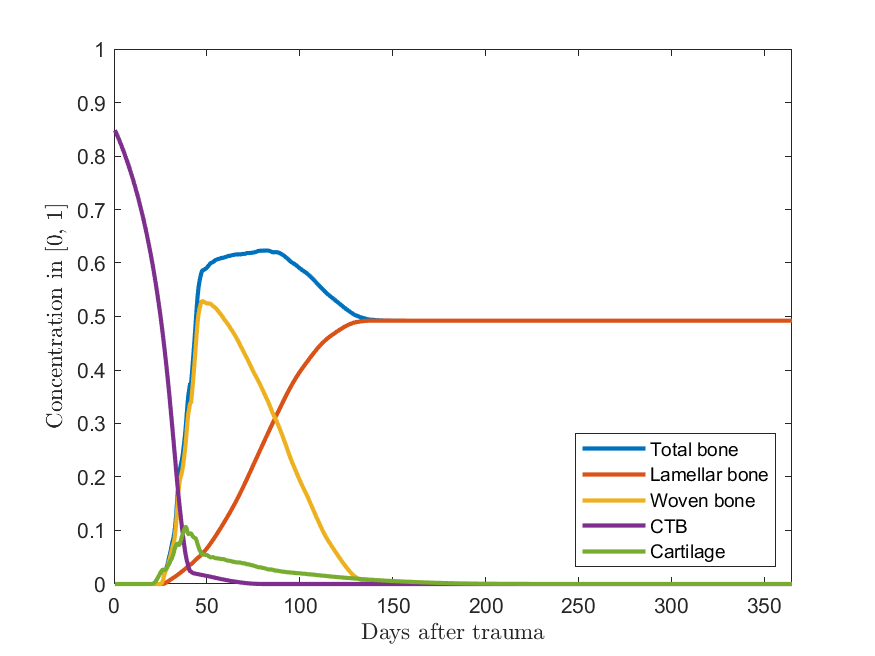

Supplement: s1 [file s1 › supplementary/supplementary-patient-information.docx]
