# Supplementary material
Source: MDPI journal article supplement (https://www.mdpi.com/2673-7078/1/1/3)
Supplement: s1 [file s1]

Archive with 3 entries (3 files):
- supplementary/supplementary-patient-information.docx
- supplementary/supplementary-patient-information.pdf
- supplementary/The Ulm Fracture Healing Model.pdf
